# Supplementary material for: A Novel Stratification Method in Linkage Studies to Address Inter- and Intra-Family Heterogeneity in Autism
Source: PubMed Central journal article supplement (PMC3694043; doi:10.1371/journal.pone.0067569), 2013-06-26
Supplement: pone.0067569.s001.pdf [file pone.0067569.s001.pdf]

## A Novel Stratification Method in Linkage Studies to Address Inter- and Intra-Family Heterogeneity in Autism

### INTRODUCTION-Supplemental information

#### Previously Reported Linkage Studies on ASD

An overview of the linked regions can be found in review articles by Freitag *et al.* [1], Abrahams *et al.* [2], Weiss *et al.* [3] as well as Craddock *et al.* [4] which provides a broader review of linkage findings related to psychiatric disorders. A synopsis of the previously reported genome-wide linkage studies clearly shows the need for subject stratification which has been explored in more recent reports. A summary of previously reported linkage studies on ASD is listed in **Table S1**.

Overall, applications of multi-gene models and genome-wide linkage studies have shown several linked loci, but with a wide variance in results. A number of proposed loci harbor promising autism candidate genes; yet subsequent studies have not confirmed their potential role in autism. In several instances, an original suggestive linkage locus even disappeared after sample size expansion. In 1998, the result of a full genome screen from 99 families was reported by the International Molecular Genetic Study of Autism Consortium (IMGSAC) [5]. Several regions showed suggestive linkage and the most significant susceptibility regions were identified on chromosomes 7q and 16p with an maximum multi-point LOD score (MLS) of 3.55 and 1.97, respectively. In 2001, the IMGSAC added additional families and markers, expanding their earlier linkage study to 152 affected sib-pairs [6]. Although the scores on chromosomes 7 and 16 showed an increase when a larger population was analyzed, the previously reported linkage scores for other chromosomes were diminished, despite increasing sample size [6].

In 2001, Liu *et al.* [7] genotyped 335 microsatellite markers in 110 multiplex families with autism from the Autism Genetic Resource Exchange (AGRE), resulting in several new suggestive linkage regions. Yonan *et al.* [8] reported a follow-up genome-wide screen using 345 AGRE families, a sample size that was three times greater than the previous study conducted by the same group [7]. When the sample size was increased to 345 families some scores were improved, while others decreased in comparison to the earlier study. For example, the scores for regions on chromosomes 19 and X were respectively decreased from 3.36 and 2.27 in 110 families to 0.69 and 1.78 in 345 families [7,8]. Such examples of decreased LOD scores with larger sample sizes illustrate some of the problems associated with replicating linkage data and demonstrate that a larger sample size alone does not necessarily translate into improved statistical outcomes. The key questions for genetic analyses are: (i) how many of these loci represent a true susceptibility region and (ii) given the phenotypic heterogeneity among cases, how can the identified loci be best associated with the respective autistic subjects?

**Table S1.** A summary of previously reported linkage results for autism. Only loci that generated the highest linkage scores are included.

| Reference | Phenotypic Criteria     | Locus                                    | Statistical Value                    | Cohort                           |
|-----------|-------------------------|------------------------------------------|--------------------------------------|----------------------------------|
| [5]       | ASD diagnosis           | 7q32.1-q34                               | multipoint MLS = 3.55                | 56 UK affected sib pair families |
|           |                         | 7q32.1-q34                               | multipoint MLS = 2.53                | 87 affected sib pair families    |
|           |                         | 16p13.2-p13.13                           | multipoint MLS = 1.97                | 56 UK affected sib pair families |
|           |                         | 16p13.2-p13.13                           | multipoint MLS = 1.51                | 87 affected sib pair families    |
|           |                         | 4p16.2-16.3                              | multipoint MLS = 1.55                | 87 affected sib pair families    |
|           |                         | 4p16.2-16.3                              | multipoint MLS = 1.1                 | 56 UK affected sib pair families |
| [9]       | ASD diagnosis           | 13q22                                    | multipoint MMLS/het = 3.0; rec model | 75 affected sib-pairs            |
|           |                         | 13q12                                    | multipoint MMLS/het = 2.3; rec model | 75 affected sib-pairs            |
|           |                         | 7q21                                     | multipoint MMLS/het = 2.2; rec model | 75 affected sib-pairs            |
| [10]      | ASD diagnosis           | 1p13.2                                   | MLS = 2.15                           | 139 multiplex families           |
|           | ASD diagnosis           | 17p13.2                                  | MLS = 1.21                           | 139 multiplex families           |
| [11]      | ASD diagnosis           | 6q16.3                                   | multipoint MLS = 2.23 (P = 0.0013)   | 51 multiplex families            |
|           |                         | 6q16.3                                   | 2 point MLS = 1.02 (P = 0.0149)      | 51 multiplex families            |
|           |                         | 18q21.33                                 | 2 point MLS = 1.47 (P = 0.0046)      | 51 multiplex families            |
|           |                         | 19p13.12                                 | 2 point MLS = 1.17 (P = 0.0102)      | 51 multiplex families            |
| [7]       | Broad ASD diagnosis     | 5p13-5p14                                | MLS = 2.5 (p = 0.003)                | 110 AGRE families                |
|           | Broad ASD diagnosis     | Xq25                                     | X-MLS = 2.56 (p = 0.0023)            | 110 AGRE families                |
|           | Broad ASD diagnosis     | 19p13.12                                 | MLS = 1.72 (p = 0.0043)              | 110 AGRE families                |
|           | Broad ASD diagnosis     | 8q24.13                                  | MLS = 1.66 (p = 0.005)               | 110 AGRE families                |
|           | Broad ASD diagnosis     | 16p13.12                                 | MLS = 1.46 (p = 0.0081)              | 110 AGRE families                |
|           | Narrow ASD diagnosis    | 19p13.12                                 | MLS = 2.53 (p = 0.00061)             | 72 AGRE families                 |
|           | Narrow ASD diagnosis    | Xq25                                     | X-MLS = 2.67 (p = 0.0018)            | 72 AGRE families                 |
|           | Narrow ASD diagnosis    | 16p13.12                                 | MLS = 1.93 (p = 0.0026)              | 72 AGRE families                 |
|           | Narrow ASD diagnosis    | 5p15.33                                  | MLS = 1.63 (p = 0.0054)              | 72 AGRE families                 |
|           | Narrow ASD diagnosis    | 5p13.1                                   | MLS = 1.41 (p = 0.0092)              | 72 AGRE families                 |
|           | [12]                    | Autism diagnosis and phrase speech delay | 2q31.3-q32.1                         | Z = 3.32 (P = 0.00038)           |
| [6]       | ASD diagnosis           | 2q24-2q31                                | MLS = 3.74                           | 152 IMGSAC families              |
|           | Strict Autism diagnosis | 2q24-2q31                                | MLS = 4.80 (P = 0.00002)             | 127 IMGSAC families              |
|           | ASD diagnosis           | 7q22-31                                  | MLS = 3.20 (P = 0.0006)              | 152 IMGSAC families              |
|           | ASD diagnosis           | 16p13                                    | MLS = 2.93                           | 152 IMGSAC families              |
| [13]      | ASD diagnosis           | 3q25-27                                  | Z <sub>max</sub> = 4.31              | 28 Finnish families              |

Table S1. Continue

|      |                                                            |               |                                |                                  |
|------|------------------------------------------------------------|---------------|--------------------------------|----------------------------------|
| [14] | Broad ASD diagnosis                                        | 2q33.1        | MLS = 1.12                     | 82 families                      |
|      | ASD and phrase speech delay >36 Mo                         | 2q33.1        | MLS = 2.86                     | 45 families                      |
|      | ASD and phrase speech delay >36 Mo                         | 2q33.1        | MLS = 1.58                     | 45 families                      |
| [15] | ASD and stereotyped patterns/repetitive behaviors on ADI-R | 15q11-q13     | Dom LOD = 4.71, Rec LOD = 3.83 | 23 families                      |
|      | ASD diagnosis                                              | 15q11-q13     | Dom LOD = 1.40, Rec LOD = 1.07 | 81 families                      |
| [8]  | Broad ASD diagnosis                                        | 5p13-5p14     | MLS = 2.54 (p = 0.00059)       | 345 AGRE families                |
|      | Broad ASD diagnosis                                        | 17q11.2       | MLS = 2.83 (p = 0.00029)       | 345 AGRE families                |
|      | Broad ASD diagnosis                                        | 11p13-11p11.2 | MLS = 2.24 (p = 0.0012)        | 345 AGRE families                |
| [16] | ASD diagnosis, male only                                   | 17q11         | MLS = 4.3 (P = 0.008)          | 257 AGRE families, 148 male only |
| [17] | ASD diagnosis                                              | 3q25-27       | NPL = 3.5 (p = 0.0003)         | A large Utah pedigree            |
| [18] | ASD diagnosis, no affected females                         | 17q11-17q21   | LOD = 4.1 (p = 0.00008)        | 91 AGRE families, 48 male only   |
| [19] | Age at first words                                         | 9q33-9q34     | Z=3.5 (P = 0.0002)             | 222 CPEA families                |
|      | Strict Autism diagnosis                                    | 7q32.1-32.2   | P = 0.0006                     | 169 families                     |
|      | Male only, broad diagnosis                                 | 11q13.4       | P = 0.0009                     | 148 families                     |
|      | Female containing                                          | 4q24          | P = 0.002                      | 74 families                      |
| [20] | Social Responsiveness Score                                | 11p12-11p13   | Zmax = 3.2 (P = 0.0007)        | 99 AGRE families                 |
| [21] | ASD diagnosis                                              | 11p12         | Z = 3.6                        | 1181 AGP families                |
| [22] | ASD diagnosis                                              | 12q13.13-q15  | HLOD = 3.02                    | 26 extended families             |
|      | ASD diagnosis, male only affected families                 | 12q13.13-q15  | Rec HLOD = 4.51 (P = 0.001)    | 17 extended families             |
| [23] | ASD diagnosis                                              | 1q23          | p = 0.00082                    | An extended-Finnish family       |
|      |                                                            | 15q11-q13     | P = 0.00084                    | An extended-Finnish family       |
|      |                                                            | 19p13.3       | P = 0.000078                   | An extended-Finnish family       |
| [30] | ASD diagnosis                                              | 20p13         | LOD=3.81                       | 878 families                     |
|      |                                                            | 6q27          | LOD=2.94                       | 878 families                     |
| [24] | ASD diagnosis, high risk families                          | Xp22.11-21.2  | max LOD=2.01, dom model        | 86 pedigrees                     |
| [25] | ASD diagnosis and IQ                                       | 10p12         | p=0.001                        | 287 multiplex families           |
|      |                                                            | 16q23         | p=0.015                        | 287 multiplex families           |
|      |                                                            | 2p21          | p=0.03                         | 287 multiplex families           |

**METHODS-Supplemental information****ADI-R Subtyping**

Phenotypic subtyping of the probands was assigned using previously performed ADI-R cluster analyses methods [27]. Briefly, this involved K-means cluster analyses ( $K = 4$ ) to divide the initial 1954 AGRE probands into four subgroups based upon severity scores on 123 items probed by the ADI-R assessment measure. Four subgroups were determined to be the optimal number for the ASD population examined based on prior Figure of Merit analysis of the ADI-R dataset as described [27]. Unsupervised principal components analysis was also used to confirm the phenotypic similarity of individual cases within the four subgroups based on their respective aggregate ADI-R severity profiles across all selected items. All analyses were performed using the Multi-experiment Viewer (MeV) software developed by Quackenbush and colleagues [28].

**Linkage Analysis**

Linkage analysis was performed using the described stratification protocol which resulted in 16 subgroup-specific datasets. Two-point non-parametric linkage (NPL) was performed using MERLIN version 1.1.2, [29] and Whittemore and Halpern NPL LOD scores were calculated using the Kong and Cox linear model. Linkage analysis of chromosome X was done using MINX, an X-specific version linkage tool available as part of the MERLIN software. High SNP density can lead to an increased likelihood that the SNPs could be in linkage disequilibrium (LD), and the failure to evaluate for marker-marker LD can cause a false inflation of LOD scores [30]. To address this concern, we used two independent SNP cohorts and focused on regions that generated suggestive linkage using both of these cohorts. Furthermore, the SNP cohort 2 contains a pruned set of high quality polymorphic markers which have been adjusted for LD by removing nearby correlated markers with  $r^2 > 0.1$ , as previously described [31].

### Permutation for Linkage Analysis

To assess how often a similar significant linkage result (i.e., max LOD scores) might arise by chance, we used the simulation function in MERLIN. A total of 100 simulated genotype data for autosomal SNPs (i.e., 16,303 markers in the SNP dataset-2) were generated for ALL, the original non-stratified group (referring to this simulated dataset as Sim100.ALL). The pedigree structures and affected status were preserved in the simulated data. The same ADI-R related stratification was then applied on the Sim100.ALL pedigree files to generate 100 simulated datasets for each of the 16 subsets. Genome-wide linkage was performed on Sim100.ALL and the generated subsets (e.g., Sim100.G1, Sim100.G1s, etc). The highest LOD score was recorded from Sim100.ALL and subset-simulated analyses. The maximum LOD for each simulated dataset (across Sim100.ALL and resultant simulated subsets) were ranked to calculate study-wide significant levels (using  $p < 0.05$  as threshold) for the observed LOD scores in the actual datasets. See **Figure S2** and **Tables S9A-B** (in **Files S3** and **S4**) for detail on the applied workflow for permutation analysis and the generated data, respectively. Throughout this paper, we refer to LOD scores  $> 3.0$  as “suggestive” linked regions if they did not pass the permutation test.

### Association Analysis

The transmission disequilibrium test (TDT) [32] was used for association analysis because the TDT is not biased by population stratification. SNPs passing quality control from the Weiss *et al.* [31] paper were used for the TDT association analysis. Only one affected subject per family was included in the TDT analysis to reduce finding associations as a reflection of linkage profile in the pedigrees showing significant linkage peaks. Detailed description of data cleaning and filtering has been discussed elsewhere [31]. Association analysis was performed using PLINK [33].

### **Visualization of LOD Scores and Cluster Analyses of Linkage Data across Subtypes**

MeV software [28] was used to permit visual comparison of suggestive linkage regions (using the LOD scores) across the 16 subgroups in comparison to that of the undivided ALL group. Unsupervised hierarchical clustering and principal components analysis of linked loci with LOD scores  $\geq 2$  in at least one of the subgroups were also conducted using MeV to demonstrate the subgroup-dependent linkage “hotspots” in a more unbiased manner.

**RESULTS-Supplemental information****Table S2.** The number of multiplex families, in each subgroup, without (n1) and with (n2) BroadSpectrum subjects.

| <b>Group</b>           | <b>n1</b> | <b>n2 (w %)</b> |
|------------------------|-----------|-----------------|
| <b>ALL<sup>a</sup></b> | 337       | 392 (76%)       |
| <b>G1</b>              | 194       | 232 (83%)       |
| <b>G1s</b>             | 41        | 63 (97%)        |
| <b>G1M</b>             | 25        | 39 (95%)        |
| <b>G1Fc*</b>           | 15        | 15 (100%)       |
| <b>G2</b>              | 157       | 185 (84%)       |
| <b>G2s</b>             | 19        | 25 (88%)        |
| <b>G2M</b>             | 12        | 16 (88%)        |
| <b>G2Fc*</b>           | 8         | 8 (88%)         |
| <b>G3</b>              | 138       | 159 (80%)       |
| <b>G3s</b>             | 31        | 35 (85%)        |
| <b>G3M</b>             | 22        | 25 (84%)        |
| <b>G3Fc*</b>           | 9         | 9 (88%)         |
| <b>G4</b>              | 116       | 126 (76%)       |
| <b>G4s</b>             | 13        | 16 (71%)        |
| <b>G4M</b>             | 7         | 8 (63%)         |
| <b>G4Fc*</b>           | 6         | 6 (67%)         |

\*The number of families did not change in the Fc subsets, after including BroadSpectrum subjects; Fc=female-containing family

<sup>a</sup>The original unstratified cohort

The respective sizes of the resulting 16 subgroups are shown. Due to the existing intra-family heterogeneity, some families were included in more than one phenotypic subgroup. Therefore, the sum of family numbers in subgroups exceeds the numbers listed for the original cohort (ALL).

w%= The prevalence of the common race (i.e., white) in each subgroups



**Table S3.** Overlap between the subgroups at the G level.

| ADI-R subtyping | Affected subjects per ADI-R related subgroups (%) |            |            |            |
|-----------------|---------------------------------------------------|------------|------------|------------|
|                 | G1                                                | G2         | G3         | G4         |
| g1 subject      | <b>59%</b>                                        | 17%        | 14%        | 10%        |
| g2 subject      | 22%                                               | <b>52%</b> | 14%        | 12%        |
| g3 subject      | 20%                                               | 14%        | <b>54%</b> | 10%        |
| g4 subject      | 19%                                               | 17%        | 14%        | <b>50%</b> |

As expected, in each G level subgroup the highest % of the included autistic subjects ( $\geq 50\%$ ) belong to the initial subgroup with the respective ADI-R determined sub-phenotype, shown in gray-shaded cells with bold font. To distinguish resultant subsets from the ADI-R clusters, the four ADI-R subtypes are labeled as g1, g2, g3, and g4.

**Table S5.** Chromosomal locations of the positive linked loci (LOD $\geq$  2) and their associated genes per subgroups. The number of families examined to identify suggestive linked loci are listed.

| Subgroup (# families) | Chromosomal location (LOD)    | Genes associated with SNPs with LOD $\geq$ 2                                                                                                                                                                            |
|-----------------------|-------------------------------|-------------------------------------------------------------------------------------------------------------------------------------------------------------------------------------------------------------------------|
| <b>ALL (392)</b>      | 17p11.2<br>(2.06-2.95)        | ALDH3A1, C17ORF108, C17ORF63, EVPLL, FLCN, KCNJ12, KSR1, LGALS9, MYO1D, NF1, NOS2, PIPOX, PRPSAP2, SLC47A1, SPACA3, TBC1D29, TMEM97, ULK2                                                                               |
| <b>G1 (232)</b>       | 13q14.1-q14.3<br>(2.04-3.39)  | CAB39L, CPB2, DHRS12, DLEU7, FAM10A4, FAM124A, FLJ3707, GUCY1B2, HTR2A, LCP1, LRCH1, PHF11, VPS36                                                                                                                       |
| G1                    | 13q21.2-q21.33<br>(3.4-4.37)  | ATXN8OS, DACH1, DIAPH3, KLHL1, PCDH9                                                                                                                                                                                    |
| G1                    | 13q22.1-q22.2<br>(2-2.53)     | KLF12, LMO7, LOC647288, PIBF1, TBC1D4, UCHL3                                                                                                                                                                            |
| <b>G1s (63)</b>       | 22q11.1-q11.23<br>(2.15-4.43) | BCR, BID, CABIN1, CECR1, CECR2, CRYBB3, CYTSA, DGCR14, FLJ41941, GSTTP2, IL17RA, IGLL1, KIAA1671, LOC91316, MAPK1, MED15, MICAL3, MIF, P2RX6, PI4KA, RAB36, SCARF2, SGSM1, SLC2A11, SMARCB1, TBX1, TXNRD2, UFD1L, USP18 |
| <b>G1Fc (15)</b>      | 22q11.1-q11.23<br>(2.09-2.54) | BCR, DGCR14, MAPK1, MED15, MICAL3, P2RX6, PI4KA, RAB36, SCARF2, TXNRD2, UFD1L, USP18                                                                                                                                    |
| <b>G1M (39)</b>       | 3q28 (2.02-2.1)               | IL1RAP                                                                                                                                                                                                                  |
| G1M                   | 15q25.1-q25.3<br>(2.03-2.52)  | ACSBG1, ADAMTSL3, C15ORF37, CPEB1, DNAJA4, FAM154B, HOMER2, IDH3A, KLHL25, NCRNA00052, NMB, NTRK3, PDE8A, RASGRF1, SH3GL3, TBC1D2B, WDR61                                                                               |
| <b>G2 (185)</b>       | 4q13.1-q13.2<br>(2.02-2.47)   | EPHA5, STAP1, TECRL                                                                                                                                                                                                     |
| G2                    | 4q22.3 (2.02-2.13)            | UNC5C                                                                                                                                                                                                                   |
| G2                    | 4q23 (2-2.17)                 | ADH1B, C4ORF37, EIF4E, RAP1GDS1, TSPAN5                                                                                                                                                                                 |
| G2                    | 10q26.3<br>(2.01-2.05)        | LRRC27, STK32C                                                                                                                                                                                                          |
| G2                    | 11q12.3 (2.03)                | AHNAK                                                                                                                                                                                                                   |

Table S5. Continue

|                 |                               |                                                                                                                               |
|-----------------|-------------------------------|-------------------------------------------------------------------------------------------------------------------------------|
| <b>G2M (16)</b> | 6q27 (2.07-2.27)              | RPS6KA2                                                                                                                       |
| G2M             | 12p13.2-p13.31<br>(2.07-2.15) | A2ML1, CD69, CLEC1B, CLEC4D, PZP, RIMKLB                                                                                      |
| <b>G3s (35)</b> | 12p12.3<br>(2.02-2.15)        | PIK3C2G                                                                                                                       |
| <b>G3M (25)</b> | 4p15.33 (2-2.19)              | HS3ST1                                                                                                                        |
| G3M             | 4p16.1<br>(2.28-2.39)         | CLNK                                                                                                                          |
| G3M             | 15q24.1-q24.3<br>(2-2.2)      | C15ORF27, LINGO1, MPI, NRG4, ODF3L1, SIN3A, SCAPER                                                                            |
| G3M             | 15q25.1-q25.3<br>(2.02-2.2)   | ACSBG1, BCL2A1, C15ORF37, DNAJA4, IDH3A, RASGRF1, TBC1D2B, WDR61                                                              |
| <b>G4 (126)</b> | 5p13.3 (2-2.01)               | ADAMTS12                                                                                                                      |
| <b>G4s (16)</b> | 3p14.1<br>(2.11-2.54)         | LRIG1, MAGI1, MIR548A2                                                                                                        |
| G4s             | 5p15.2-p15.31<br>(2-2.05)     | LOC285692, SEMA5A                                                                                                             |
| G4s             | 6q25.1<br>(2-2.03)            | PLEKGH1, UST, ZC3H12D                                                                                                         |
| G4s             | 10q23.1-q23.33<br>(2-2.05)    | ANKRD22, ATAD1, BMPR1A, EXOC6, GHITM, GRID1, IDE, IFIT2, LDB3, LIPA, LIPJ, LIPM, LOC10018894, MYOF, PANK1, SLC16A12, STAMBPL1 |
| G4s             | 11p14.3 (2-2.11)              | GAS2, SLC17A6                                                                                                                 |
| G4s             | 11p15.1 (2)                   | ABCC8, GTF2H1, NAV2, NELL1, PLEKHA7, PRMT3, PTPN5, SAA4, SERGEF, SLC6A5, TPH1, UEVLD, USH1C                                   |
| G4s             | 12q15 (2.07)                  | PTPRR                                                                                                                         |
| G4s             | 12q21.1-q21.2<br>(2-3.56)     | CSRP2, E2F7, KCNC2, LGR5, LOC283392, NAP1L1, NAV3, TPH2, TRHDE, TSPAN8, ZDHHC17                                               |

**Table S6.** TDT result for two previously associated SNPs at chromosome 5p\*.

| dataset (no of pedigrees) | SNP                     | A1 | A2 | T  | U  | OR     | P       |
|---------------------------|-------------------------|----|----|----|----|--------|---------|
| G1.2Fc (23)               | rs10513025 <sup>a</sup> | G  | A  | 0  | 4  | 0      | 0.0455  |
| G1.2Fc (23)               | rs4307059 <sup>b</sup>  | G  | A  | 4  | 14 | 0.2857 | 0.01842 |
| All.Fc (166)              | rs10513025 <sup>a</sup> | G  | A  | 7  | 10 | 0.7    | 0.4669  |
| All.Fc (166)              | rs4307059 <sup>b</sup>  | G  | A  | 56 | 67 | 0.8358 | 0.3213  |

Transmitted (T) and untransmitted (U) counts and odds ratios (OR) for the minor allele (A1) are shown for each SNP

<sup>a</sup> the most significant SNP reported by Weiss *et al.* (31)

<sup>b</sup> the most significant SNP reported by Wang *et al.* (26)

\*Our study found a suggestive linkage at the 5p locus for the combined G1.2Fc group (23 pedigrees). To assess associations with the previously reported SNPs for this chromosomal region, TDT association analyses were performed on this ADI-R stratified group compared with All.Fc (166 pedigrees), which includes all female-containing pedigrees. Only one affected sibling per each pedigree was included for the TDT analysis to avoid detecting associations because of linked SNPs.

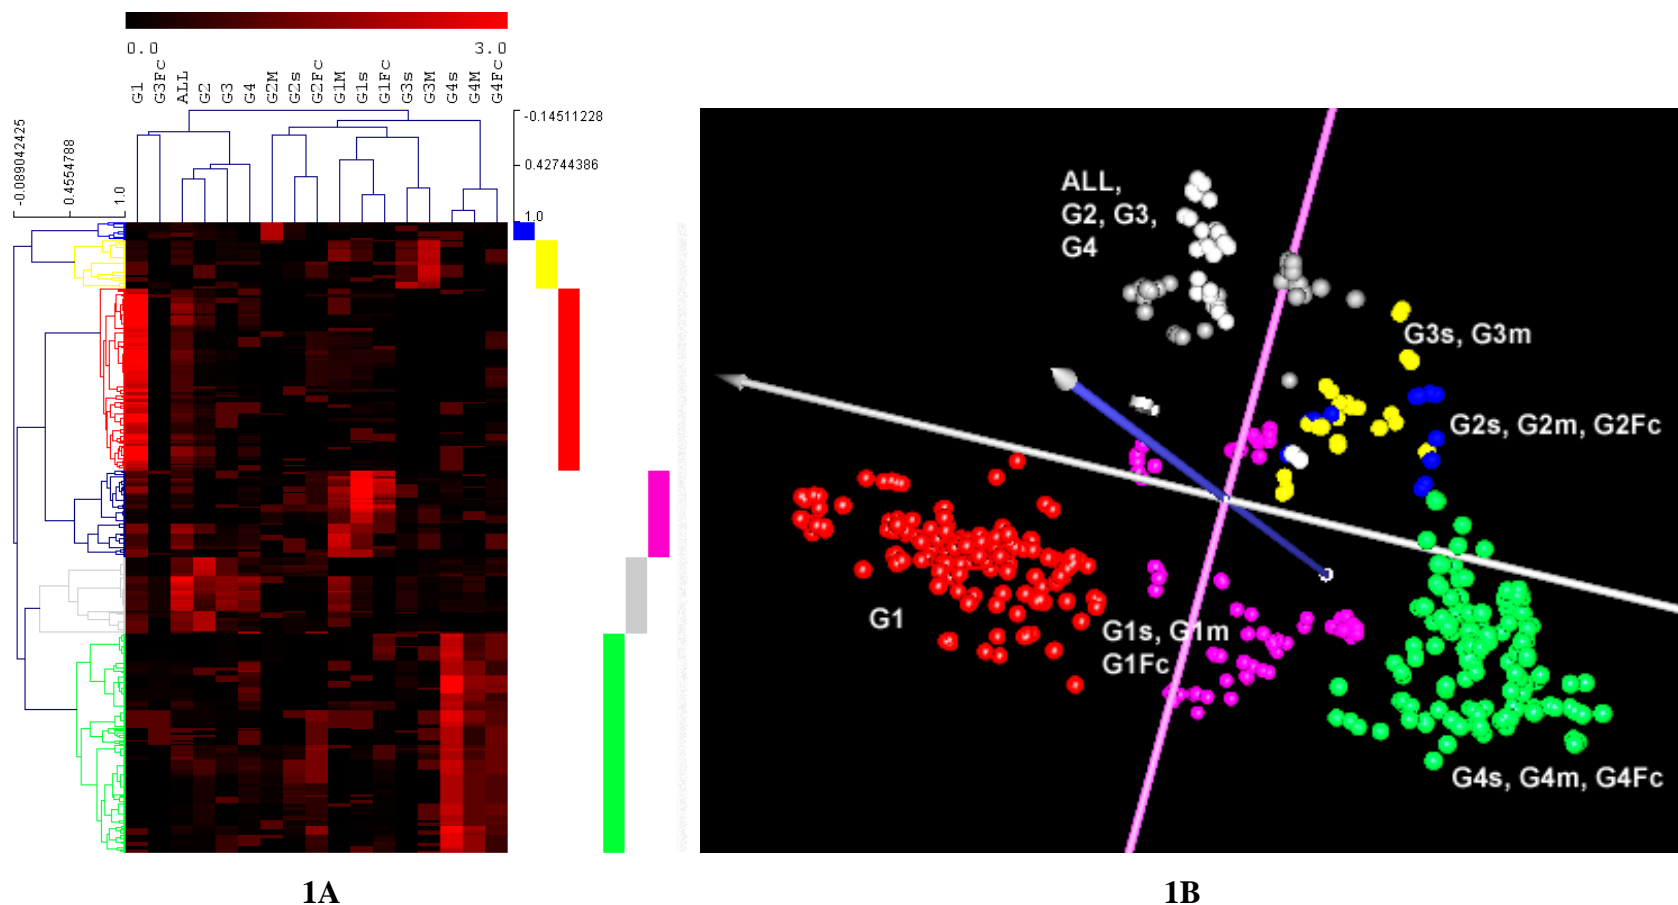

**Figure S1. Hierarchical clustering and principal components analyses.** **S1A** (left) shows the results of unsupervised hierarchical clustering of subgroups and loci with  $LOD \geq 2$  in at least one ASD subgroup. Each column represents a subgroup and each row represents a SNP. The length of the branches along both axes is inversely related to the correlation between the subgroups (columns) and loci (rows) as determined by the Pearson coefficient (scales along both axes). **S1B** (right) shows the results of principal components analyses of the loci, wherein the color corresponds to the major branches along the SNP axis in **Figure S1A**. Magenta is used for stratified subgroups G1s, G1M, and G1Fc, while red is used for the G1 group.

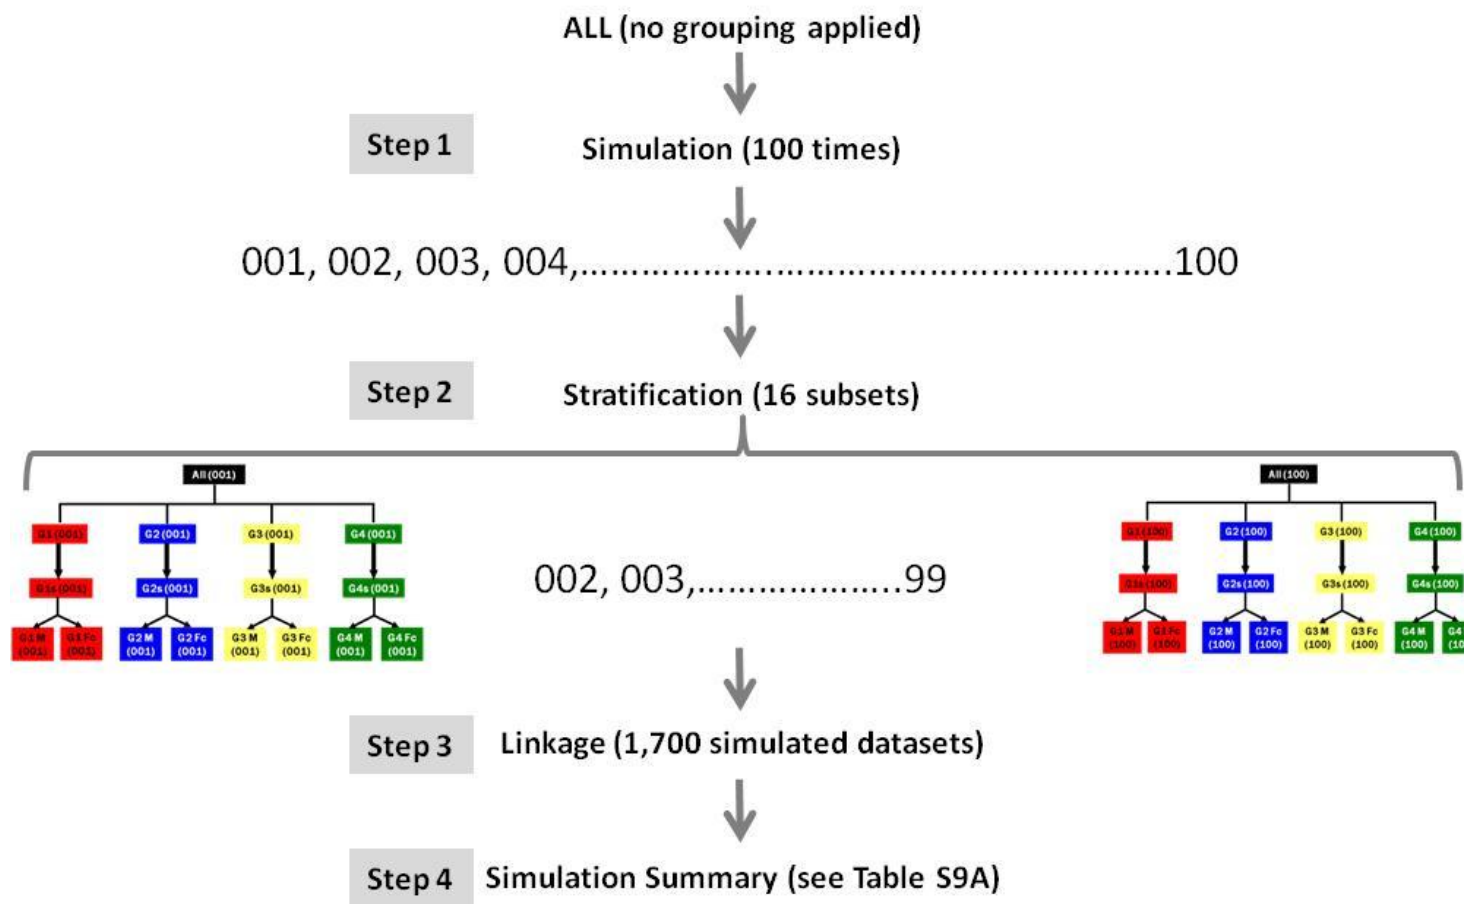

**Figure S2. Workflow describing the applied permutation analysis.** Simulation analysis involved the following steps. **Step 1:** performed 100 simulations on the main group (i.e., ALL); **Step 2:** utilized the same stratification method as what was applied on the actual dataset (see **Figure 1**) to generate the same 16 subgroups, resulting in 1,700 simulated files for genome-wide scans; **Step 3:** performed genome-wide scan on 1,700 simulated files; and **Step 4:** evaluated LOD scores for calculating empirical p values [see **Table S9A (File S3)** for data]. Furthermore, similarly 100 simulated files were generated for the three combined groups that we have tested (e.g., G1.2Fc, etc), resulting in 300 more simulated files. Therefore, overall a total of 2000 genome-wide scans were generated and analyzed for permutation analysis [see **Table S9B (File S4)**].

**DISCUSSIONS-Supplemental information****Additional Potential Candidate Genes in the Linked Regions**

Supplementary **Tables S7 and S8** list the genes associated with the SNPs with the highest LOD scores in 13q21 and 22q11 regions, respectively. One of the genes in the 13q21 linked region is *PCDH9*, a neuronal protocadherin that is a component of synaptic complexes. *PCDH9* was previously found to be associated with ASD by CNV analyses [34]. Another potentially relevant gene in this region is *KLHL1*, which is associated with gait disturbance [35], a motor phenotype affecting some individuals with ASD [36]. An antisense transcript to *KLHL1* (*ATXN8OS* or *KLHLIAS*) is also within the linked region. Expansion of unstable trinucleotide repeat tracts in *ATXN8OS* has been associated with spinocerebellar ataxia type 8, a late-onset progressive neurodegenerative disorder also featuring severe gait, speech and sensory loss. Long repeat tracts of this transcript have been also reported in subjects with schizophrenia and bipolar disorder [37]. Down regulating *KLHL1* expression through an antisense mechanism has been shown as a potential way that repeat expansions in this non protein-coding RNA may lead to neuropathogenesis [38].

With respect to candidate genes on 22q11, *MAPK1*, *MICAL3*, and *USP18* fall in the linkage interval (see **Table S8**). While *MAPK1* is a critical component of many signaling pathways, including MTOR signaling which is strongly implicated in ASD and related disorders, *MICAL3* is specifically involved in semaphorin-Plexin A signaling in motor neurons [39]. *USP18*, on the other hand, is a ubiquitin-specific protease that plays a role in interferon response to viral infection of brain cells [40] and in innate immunity [41], which has been suggested to contribute to the neuropathology of ASD [42,43].

**Table S7.** List of the genes associated with the SNPs with the highest LOD scores in 13q21 (G1 group).

| Gene    | LOD  | SNP        | Chromosomal location | SNP's position in gene |
|---------|------|------------|----------------------|------------------------|
| PCDH9   | 4.37 | rs4142274  | 13q21.32             | Intron                 |
| PCDH9   | 4.36 | rs4883796  | 13q21.32             | Intron                 |
| PCDH9   | 4.35 | rs9317631  | 13q21.32             | Intron                 |
| PCDH9   | 4.26 | rs913493   | 13q21.32             | Intron                 |
| PCDH9   | 4.24 | rs2324967  | 13q21.32             | Intron                 |
| PCDH9   | 4.22 | rs7324330  | 13q21.32             | Intron                 |
| KLHL1   | 3.98 | rs7986686  | 13q21.33             | Intron                 |
| PCDH9   | 3.86 | rs11148709 | 13q21.32             | Intron                 |
| PCDH9   | 3.71 | rs166500   | 13q21.32             | Intron                 |
| KLHL1   | 3.69 | rs4884871  | 13q21.33             | Intron                 |
| ATXN8OS | 3.66 | rs9564649  | 13q21.33             | Promoter               |
| KLHL1   | 3.66 | rs683300   | 13q21.33             | Intron                 |
| ATXN8OS | 3.65 | rs9599553  | 13q21.33             | Intron                 |
| PCDH9   | 3.64 | rs9540711  | 13q21.32             | Intron                 |
| ATXN8OS | 3.64 | rs9529683  | 13q21.33             | Downstream             |
| DIAPH3  | 3.11 | rs1337645  | 13q21.2              | Intron                 |
| DIAPH3  | 3.11 | rs342594   | 13q21.2              | Intron                 |
| DACH1   | 2.75 | rs966168   | 13q21.33             | Intron                 |



**Table S8.** List of the genes associated with the SNPs with the highest LOD scores in 22q11 (G1s group).

| Gene     | LOD  | SNP        | Chromosomal location | SNP's position in gene |
|----------|------|------------|----------------------|------------------------|
| MAPK1    | 4.43 | rs2283792  | 22q11.21             | Intron                 |
| FLJ41941 | 4.41 | rs462904   | 22q11.21             | Downstream             |
| MICAL3   | 4.4  | rs452579   | 22q11.21             | Intron                 |
| MICAL3   | 4.38 | rs424765   | 22q11.21             | Intron                 |
| MICAL3   | 4.36 | rs9604803  | 22q11.21             | Intron                 |
| USP18    | 4.28 | rs2252257  | 22q11.21             | Intron (boundary)      |
| BID      | 3.99 | rs181408   | 22q11.21             | Intron                 |
| P2RX6    | 3.86 | rs8141816  | 22q11.21             | Intron                 |
| CECR2    | 3.72 | rs1296795  | 22q11.21             | Intron (boundary)      |
| PI4KA    | 3.59 | rs165924   | 22q11.21             | Intron (boundary)      |
| RAB36    | 3.59 | rs5751592  | 22q11.22             | Intron                 |
| DGCR14   | 3.58 | rs16983371 | 22q11.21             | Intron                 |
| BCR      | 3.58 | rs2071436  | 22q11.23             | Intron                 |
| BCR      | 3.53 | rs7288846  | 22q11.23             | Intron                 |
| CECR2    | 3.45 | rs2518768  | 22q11.21             | Intron                 |
| UFD1L    | 3.44 | rs756658   | 22q11.21             | Intron                 |
| TBX1     | 2.96 | rs5748427  | 22q11.21             | Downstream             |
| TXNRD2   | 2.93 | rs2073750  | 22q11.21             | Intron                 |
| TXNRD2   | 2.89 | rs5993875  | 22q11.21             | Intron                 |
| IL17RA   | 2.78 | rs2241049  | 22q11.1              | Intron                 |
| MED15    | 2.77 | rs7292126  | 22q11.21             | Intron                 |
| SCARF2   | 2.76 | rs882745   | 22q11.21             | Intron (boundary)      |
| CECR1    | 2.73 | rs1076106  | 22q11.1              | Intron                 |
| IPLL1    | 2.73 | rs7287616  | 22q11.23             | Promoter               |
| LOC91316 | 2.7  | rs738785   | 22q11.23             | Intron                 |
| SMARCB1  | 2.57 | rs2267032  | 22q11.23             | Intron                 |
| SGSM1    | 2.38 | rs6004307  | 22q11.23             | Intron                 |
| SLC2A11  | 2.31 | rs738803   | 22q11.23             | Promoter               |
| MIF      | 2.25 | rs738806   | 22q11.23             | Promoter               |
| GSTTP2   | 2.18 | rs738809   | 22q11.23             | Promoter               |
| KIAA1671 | 2.18 | rs984814   | 22q11.23             | Intron                 |
| SGSM1    | 2.18 | rs7287595  | 22q11.23             | Intron                 |
| CABIN1   | 2.17 | rs2267064  | 22q11.23             | Intron                 |
| CYTSA    | 2.17 | rs2082733  | 22q11.23             | Intron                 |
| CRYBB3   | 2.15 | rs1054476  | 22q11.23             | Downstream             |

**REFERENCES-Supplemental information**

1. Freitag CM, Staal W, Klauck SM, Duketis E, Waltes R (2010) Genetics of autistic disorders: review and clinical implications. *Eur Child Adolesc Psychiatry* 19: 169-178.
2. Abrahams BS, Geschwind DH (2008) Advances in autism genetics: on the threshold of a new neurobiology. *Nat Rev Genet* 9: 341-355.
3. Weiss LA (2009) Autism genetics: emerging data from genome-wide copy-number and single nucleotide polymorphism scans. *Expert Rev Mol Diagn* 9: 795-803.
4. Craddock N, Lendon C (1999) Chromosome Workshop: chromosomes 11, 14, and 15. *Am J Med Genet* 88: 244-254.
5. IMGSAC (1998) A full genome screen for autism with evidence for linkage to a region on chromosome 7q. *Hum Mol Genet* 7: 571-578.
6. IMGSAC (2001) A genomewide screen for autism: strong evidence for linkage to chromosomes 2q, 7q, and 16p. *Am J Hum Genet* 69: 570-581.
7. Liu J, Nyholt DR, Magnussen P, Parano E, Pavone P, et al. (2001) A genomewide screen for autism susceptibility loci. *Am J Hum Genet* 69: 327-340.
8. Yonan AL, Alarcon M, Cheng R, Magnusson PK, Spence SJ, et al. (2003) A genomewide screen of 345 families for autism-susceptibility loci. *Am J Hum Genet* 73: 886-897.
9. Barrett S, Beck JC, Bernier R, Bisson E, Braun TA, et al. (1999) An autosomal genomic screen for autism. Collaborative linkage study of autism. *Am J Med Genet* 88: 609-615.
10. Risch N, Spiker D, Lotspeich L, Nouri N, Hinds D, et al. (1999) A genomic screen of autism: evidence for a multilocus etiology. *Am J Hum Genet* 65: 493-507.
11. Philippe A, Martinez M, Guilloud-Bataille M, Gillberg C, Rastam M, et al. (1999) Genome-wide scan for autism susceptibility genes. Paris Autism Research International Sibpair Study. *Hum Mol Genet* 8: 805-812.
12. Buxbaum JD, Silverman JM, Smith CJ, Kilifarski M, Reichert J, et al. (2001) Evidence for a susceptibility gene for autism on chromosome 2 and for genetic heterogeneity. *Am J Hum Genet* 68: 1514-1520.
13. Auranen M, Vanhala R, Varilo T, Ayers K, Kempas E, et al. (2002) A genomewide screen for autism-spectrum disorders: evidence for a major susceptibility locus on chromosome 3q25-27. *Am J Hum Genet* 71: 777-790.
14. Shao Y, Raiford KL, Wolpert CM, Cope HA, Ravan SA, et al. (2002) Phenotypic homogeneity provides increased support for linkage on chromosome 2 in autistic disorder. *Am J Hum Genet* 70: 1058-1061.
15. Shao Y, Cuccaro ML, Hauser ER, Raiford KL, Menold MM, et al. (2003) Fine mapping of autistic disorder to chromosome 15q11-q13 by use of phenotypic subtypes. *Am J Hum Genet* 72: 539-548.
16. Stone JL, Merriman B, Cantor RM, Yonan AL, Gilliam TC, et al. (2004) Evidence for sex-specific risk alleles in autism spectrum disorder. *Am J Hum Genet* 75: 1117-1123.

17. Coon H, Matsunami N, Stevens J, Miller J, Pingree C, et al. (2005) Evidence for linkage on chromosome 3q25-27 in a large autism extended pedigree. *Hum Hered* 60: 220-226.
18. Cantor RM, Kono N, Duvall JA, Alvarez-Retuerto A, Stone JL, et al. (2005) Replication of autism linkage: fine-mapping peak at 17q21. *Am J Hum Genet* 76: 1050-1056.
19. Schellenberg GD, Dawson G, Sung YJ, Estes A, Munson J, et al. (2006) Evidence for multiple loci from a genome scan of autism kindreds. *Mol Psychiatry* 11: 1049-1060, 1979.
20. Duvall JA, Lu A, Cantor RM, Todd RD, Constantino JN, et al. (2007) A quantitative trait locus analysis of social responsiveness in multiplex autism families. *Am J Psychiatry* 164: 656-662.
21. Szatmari P, Paterson AD, Zwaigenbaum L, Roberts W, Brian J, et al. (2007) Mapping autism risk loci using genetic linkage and chromosomal rearrangements. *Nat Genet* 39: 319-328.
22. Ma DQ, Cuccaro ML, Jaworski JM, Haynes CS, Stephan DA, et al. (2007) Dissecting the locus heterogeneity of autism: significant linkage to chromosome 12q14. *Mol Psychiatry* 12: 376-384.
23. Kilpinen H, Ylisaukko-oja T, Rehnstrom K, Gaal E, Turunen JA, et al. (2009) Linkage and linkage disequilibrium scan for autism loci in an extended pedigree from Finland. *Hum Mol Genet* 18: 2912-2921.
24. Allen-Brady K, Cannon D, Robison R, McMahan WM, Coon H (2010) A unified theory of autism revisited: linkage evidence points to chromosome X using a high-risk subset of AGRE families. *Autism Res* 3: 47-52.
25. Chapman NH, Estes A, Munson J, Bernier R, Webb SJ, et al. (2011) Genome-scan for IQ discrepancy in autism: evidence for loci on chromosomes 10 and 16. *Hum Genet* 129: 59-70.
26. Wang K, Zhang H, Ma D, Bucan M, Glessner JT, et al. (2009) Common genetic variants on 5p14.1 associate with autism spectrum disorders. *Nature* 459: 528-533.
27. Hu VW, Steinberg ME (2009) Novel clustering of items from the Autism Diagnostic Interview-Revised to define phenotypes within autism spectrum disorders. *Autism Res* 2: 67-77.
28. Saeed AI, Sharov V, White J, Li J, Liang W, et al. (2003) TM4: a free, open-source system for microarray data management and analysis. *Biotechniques* 34: 374-378.
29. Abecasis GR, Cherny SS, Cookson WO, Cardon LR (2002) Merlin--rapid analysis of dense genetic maps using sparse gene flow trees. *Nat Genet* 30: 97-101.
30. Abecasis GR, Wigginton JE (2005) Handling marker-marker linkage disequilibrium: pedigree analysis with clustered markers. *Am J Hum Genet* 77: 754-767.
31. Weiss LA, Arking DE, Daly MJ, Chakravarti A (2009) A genome-wide linkage and association scan reveals novel loci for autism. *Nature* 461: 802-808.
32. Spielman RS, McGinnis RE, Ewens WJ (1993) Transmission test for linkage disequilibrium: the insulin gene region and insulin-dependent diabetes mellitus (IDDM). *Am J Hum Genet* 52: 506-516.

33. Purcell S, Neale B, Todd-Brown K, Thomas L, Ferreira MA, et al. (2007) PLINK: a tool set for whole-genome association and population-based linkage analyses. *Am J Hum Genet* 81: 559-575.
34. Marshall CR, Noor A, Vincent JB, Lionel AC, Feuk L, et al. (2008) Structural variation of chromosomes in autism spectrum disorder. *Am J Hum Genet* 82: 477-488.
35. He Y, Zu T, Benzow KA, Orr HT, Clark HB, et al. (2006) Targeted deletion of a single Sca8 ataxia locus allele in mice causes abnormal gait, progressive loss of motor coordination, and Purkinje cell dendritic deficits. *J Neurosci* 26: 9975-9982.
36. Maski KP, Jeste SS, Spence SJ (2011) Common neurological co-morbidities in autism spectrum disorders. *Curr Opin Pediatr* 23: 609-615.
37. Vincent JB, Yuan QP, Schalling M, Adolfsson R, Azevedo MH, et al. (2000) Long repeat tracts at SCA8 in major psychosis. *Am J Med Genet* 96: 873-876.
38. Chen WL, Lin JW, Huang HJ, Wang SM, Su MT, et al. (2008) SCA8 mRNA expression suggests an antisense regulation of KLHL1 and correlates to SCA8 pathology. *Brain Res* 1233: 176-184.
39. Bron R, Vermeren M, Kokot N, Andrews W, Little GE, et al. (2007) Boundary cap cells constrain spinal motor neuron somal migration at motor exit points by a semaphorin-plexin mechanism. *Neural Dev* 2: 21.
40. van den Pol AN, Robek MD, Ghosh PK, Ozduman K, Bandi P, et al. (2007) Cytomegalovirus induces interferon-stimulated gene expression and is attenuated by interferon in the developing brain. *J Virol* 81: 332-348.
41. Ritchie KJ, Hahn CS, Kim KI, Yan M, Rosario D, et al. (2004) Role of ISG15 protease UBP43 (USP18) in innate immunity to viral infection. *Nat Med* 10: 1374-1378.
42. Vargas DL, Nascimbene C, Krishnan C, Zimmerman AW, Pardo CA (2005) Neuroglial activation and neuroinflammation in the brain of patients with autism. *Ann Neurol* 57: 67-81.
43. Pardo CA, Vargas DL, Zimmerman AW (2005) Immunity, neuroglia and neuroinflammation in autism. *Int Rev Psychiatry* 17: 485-495.
